# Supplementary material for: A chirally helical coordination polymer self-assembled with the ligand 2-(2-carboxyphenyl)imidazo(4,5-f)(1,10)phenanthroline: crystal structure, SHG response and tunable photoluminescence
Source: Royal Society of Chemistry journal article supplement (doi:10.1039/c0ce00547a), 2010-10-29
Supplement: c0ce00547a.pdf [file c0ce00547a.pdf]

*Materials and measurements:* Synthetic route of O-HNCP is the same as that of HNCP according to the literature,<sup>5</sup> excepting that 2-carboxybenzaldehyde substituted for 4-carboxybenzaldehyde. All other commercially available starting materials were analytical reagent grade and used as received without further purification. C, H, N and O analyses were determined on a Vario EL III CHNOS Elemental Analyzer. Intensity data for single crystals were collected on a Rigaku Mercury CCD diffractometer with graphite-monochromatized Mo  $K\alpha$  radiation ( $\lambda = 0.71073 \text{ \AA}$ ). X-ray powder diffraction was recorded on a Rigaku DMAX2500PC diffractometer with Cu  $K\alpha$  radiation. Thermogravimetric analysis (TGA) was carried out under an N<sub>2</sub> atmosphere from 30 to 800 °C at a heating rate of 10 °C/min, using a Thermal Analyst 2100 TA Instrument and a SDT 2960 Simultaneous TGA-DTA Instrument. The fluorescent spectra were recorded on an Edinburgh Analytical instruments analyzer model FLS920.

*SHG measurements for 1:* Second-order nonlinear optical effect for microcrystalline **1** was investigated by optical second harmonic generation (SHG) on the basis of the principles proposed by Kurtz and Perry.<sup>11</sup> Second-harmonic generation intensity data were obtained by placing a microcrystalline sample in an intense fundamental beam from a Q-switched Nd:YAG laser at a wavelength of 1064nm. The backward scattered SHG light was collected using a spherical concave mirror and passed through a filter transmitting only frequency-doubled 532nm radiation which was detected on an oscilloscope. This procedure was then repeated using a standard NLO material (microcrystalline KDP), and the ratio of the second-harmonic intensity outputs was calculated.

Table S1. Selected bond lengths (Å) and angles (deg) for [Zn(H<sub>2</sub>O)(ONCP)Cl]<sub>n</sub>.

| Left-handed helice of [Zn(H <sub>2</sub> O)(ONCP)Cl] <sub>n</sub>  |           |                                |            |                                 |            |
|--------------------------------------------------------------------|-----------|--------------------------------|------------|---------------------------------|------------|
| Zn(1)-N(1)                                                         | 2.214(3)  | Zn(1)-N(2)                     | 2.116(3)   | Zn(1)-O(1) <sup>#1</sup>        | 2.056(3)   |
| Zn(1)-O(3)                                                         | 1.987(3)  | Zn(1)-Cl(1)                    | 2.2826(13) |                                 |            |
| N(1)-Zn(1)-N(2)                                                    | 73.48(10) | O(1) <sup>#1</sup> -Zn(1)-O(3) | 89.25(12)  | N(1)-Zn(1)-O(3)                 | 93.36(12)  |
| N(2)-Zn(1)-O(1) <sup>#1</sup>                                      | 89.68(11) | N(1)-Zn(1)-Cl(1)               | 100.61(11) | O(1) <sup>#1</sup> -Zn(1)-Cl(1) | 109.03(10) |
| Symmetry code: #1 -x+1, y+1/2, -z+1                                |           |                                |            |                                 |            |
| Right-handed helice of [Zn(H <sub>2</sub> O)(ONCP)Cl] <sub>n</sub> |           |                                |            |                                 |            |
| Zn(1)-N(1)                                                         | 2.213(3)  | Zn(1)-N(2)                     | 2.120(3)   | Zn(1)-O(1) <sup>#2</sup>        | 2.059(3)   |
| Zn(1)-O(3)                                                         | 1.987(3)  | Zn(1)-Cl(1)                    | 2.2830(18) |                                 |            |
| N(1)-Zn(1)-N(2)                                                    | 73.59(12) | O(1) <sup>#2</sup> -Zn(1)-O(3) | 89.18(14)  | N(1)-Zn(1)-O(3)                 | 93.41(13)  |
| N(2)-Zn(1)-O(1) <sup>#2</sup>                                      | 89.54(13) | N(1)-Zn(1)-Cl(1)               | 100.56(14) | O(1) <sup>#2</sup> -Zn(1)-Cl(1) | 109.10(12) |
| Symmetry code: #2 -x, y-1/2, -z+1                                  |           |                                |            |                                 |            |

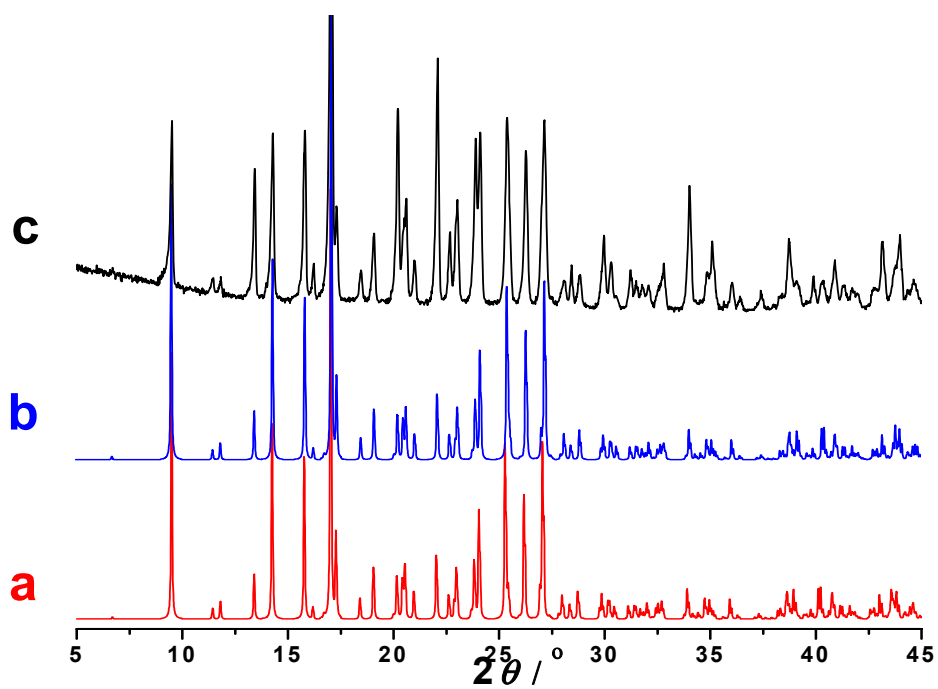

Figure S1. Simulated XRPDs for left-handed (a) and right-handed (b) helices of  $[\text{Zn}(\text{H}_2\text{O})(\text{ONCP})\text{Cl}]_n$ , and experimental XRPD (c).

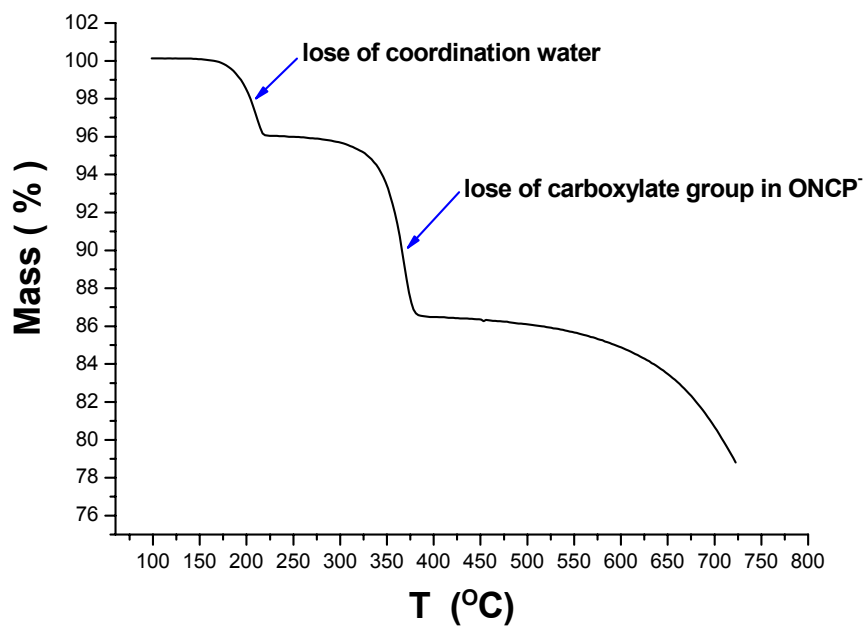

Figure S2. Thermogravimetric analysis for  $[\text{Zn}(\text{H}_2\text{O})(\text{ONCP})\text{Cl}]_n$ .
